# Supplementary material for: Rare patterns of dorsal puncture in Pterostichus oblongopunctatus (Coleoptera: Carabidae)
Source: PeerJ. 2018 Apr 20;6:e4657. doi: 10.7717/peerj.4657 (PMC5912206; doi:10.7717/peerj.4657)
Supplement: Data S1 [file peerj-06-4657-s001.xlsx]

## Sheet: Raw_data
Year	Area	Studys site	Sex (1-male, 2-female, ?-sex not determined)	Pits in the intervals of elytra						Length of right elytra (mm)
				7-left	5-left	3-left	3-right	5-right	7-right
2014	Krzywda	KA1	2			8	9			0.705
2014	Krzywda	KA1	1			5	6			0.615
2014	Krzywda	KD1	2			5	5			0.61
2014	Krzywda	KD1	2			7	5			0.628
2014	Krzywda	KG1	1		1	6	5			0.626
2014	Krzywda	KG1	1			5	5		1	0.683
2014	Krzywda	KG1	1			5	6			0.616
2014	Krzywda	KG1	2			5	6			0.646
2014	Krzywda	KG1	2			5	5	1		0.712
2014	Krzywda	KG1	2			5	5			0.621
2014	Krzywda	KG1	2		1	5	6			0.66
2014	Krzywda	KG1	2			5	5			0.701
2014	Krzywda	KG1	2	damaged	damaged	damaged	5			0.702
2014	Krzywda	KG3	1			5	5			0.661
2014	Krzywda	K16-1	2			6	6			0.641
2014	Krzywda	K16-2	2			5	5			0.69
2014	Krzywda	K14-1	2			5	5			0.656
2014	Krzywda	K14-1	2			5	5			0.675
2014	Krzywda	K14-2	2			6	5			0.67
2014	Krzywda	K14-2	2			7	6			0.612
2014	Krzywda	K14-2	2			6	5	1		0.674
2014	Krzywda	K14-2	2			7	6	1		0.651
2014	Krzywda	K14-3	1			6	6			0.649
2014	Krzywda	K14-3	1			6	6			0.645
2014	Krzywda	K14-3	1		1	6	7			0.625
2014	Krzywda	K14-3	2			5	6			0.678
2014	Krzywda	K14-3	2			5	5			0.625
2014	Krzywda	K14-3	2			7	5			0.626
2014	Krzywda	K20-1	1			5	6			0.6
2014	Krzywda	K21-2	2			6	6			0.702
2014	Krzywda	K21-2	2			6	6			0.675
2014	Krzywda	K21-3	2		1	9	6			0.682
2014	Krzywda	K21-3	2		1	6	7			0.693
2014	Krzywda	K21-3	2			6	7			0.667
2014	Krzywda	K35-1	2			5	5			0.685
2014	Krzywda	K35-2	2			5	5			0.592
2014	Krzywda	K35-2	2			5	6			0.685
2014	Krzywda	K35-2	2		1	5	5	1		0.693
2014	Krzywda	K35-3	2			6	6			0.68
2014	Trzcianka	T2-2	1			6	5			0.644
2014	Trzcianka	T2-2	2			6	5			0.657
2014	Trzcianka	T2-3	1			5	5			0.657
2014	Trzcianka	T2-3	2			5	5			0.698
2014	Kaczory	Ka1-1	2		1	6	6			0.646
2014	Kaczory	Ka1-1	2			6	6			0.68
2014	Kaczory	Ka2-1	1			7	6			0.675
2014	Kaczory	Ka2-1	1			5	4			0.638
2014	Kaczory	Ka2-1	2			6	5			0.638
2014	Kaczory	Ka2-1	2			5	6			0.635
2014	Kaczory	Ka2-3	1			5	5			0.653
2014	Kaczory	Ka2-3	2			6	5			0.675
2014	Kaczory	Ka2-3	2			5	5			0.705
2014	Zdrojowa Góra	Z1-3	2		1	5	5			0.72
2014	Zdrojowa Góra	Z2-1	2			5	5			0.687
2014	Zdrojowa Góra	Z2-1	2			5	6	1		0.674
2014	Zdrojowa Góra	Z2-3	1			6	6			0.67
2014	Zdrojowa Góra	Z1c	2			6	6			0.67
2014	Zdrojowa Góra	Z1c	2			5	5			0.71
2014	Potrzebowice	P1	1			5	5			0.677
2014	Potrzebowice	P1	2			5	6			0.687
2014	Potrzebowice	P3	1			5	5			0.65
2014	Potrzebowice	P5	1			4	5			0.605
2014	Potrzebowice	P6	1			5	5			0.617
2014	Potrzebowice	P6	2			5	6			0.685
2014	Potrzebowice	P6	2			6	5			0.63
2014	Potrzebowice	P8'	1			4	8			0.66
2014	Potrzebowice	P8'	2			5	6			0.674
2014	Potrzebowice	P9	?			5	6			0.637
2014	Potrzebowice	P9	?			5	missing	missing	missing	missing
2014	Potrzebowice	P10	1			5	5			0.68
2014	Potrzebowice	P10	2			6	5			0.663
2014	Potrzebowice	P11	1		1	6	6			0.618
2014	Potrzebowice	P11	1			5	5			0.662
2014	Potrzebowice	P11	2			5	5			0.615
2014	Potrzebowice	P11	2			5	5			0.656
2014	Potrzebowice	P11	2			5	6			0.665
2014	Potrzebowice	P13	1			4	5			0.665
2014	Potrzebowice	P13	2			5	5			0.678
2014	Potrzebowice	P13	2			6	5			0.645
2014	Potrzebowice	P14	2			7	8			0.662
2014	Potrzebowice	P16	1			6	5			0.631
2014	Potrzebowice	P18	2			6	5			0.672
2014	Potrzebowice	P21	1			6	5			0.67
2014	Potrzebowice	P21	1			5	5			0.695
2014	Potrzebowice	P22	2			6	5	1		0.665
2014	Potrzebowice	P24	1			4	5			0.594
2014	Potrzebowice	P24	2			6	6			0.653
2014	Potrzebowice	P24	2			5	4			0.653
2014	Potrzebowice	P24	2		1	7	7	1		0.697
2014	Potrzebowice	P24	2			5	6			0.697
2014	Potrzebowice	P25	2			7	7		1	0.698
2014	Potrzebowice	P25	2			5	5			0.71
2014	Potrzebowice	P29	1			5	5			0.664
2014	Potrzebowice	P29	2			6	5			0.704
2014	Potrzebowice	P33	1			5	4			0.588
2014	Potrzebowice	P33	2			4	4	1		0.591
2014	Potrzebowice	P33	2			5	5	1		0.67
2014	Potrzebowice	P34	2		2	6	5	1		0.688
2014	Potrzebowice	P35	2			7	7			0.665
2014	Potrzebowice	P35	2			5	5			0.645
2014	Potrzebowice	P35	2			6	6			0.687
2014	Potrzebowice	P36	2			6	5			0.6
2014	Potrzebowice	P36	2			6	6			0.62
2014	Potrzebowice	P36	2			5	5			0.659
2014	Potrzebowice	P37	1			6	6			0.683
2014	Potrzebowice	P37	1			4	5			0.658
2014	Potrzebowice	P37	2			5	5			0.649
2014	Potrzebowice	P37	2			5	5			0.716
2014	Potrzebowice	P37	2			6	6	1		0.695
2014	Potrzebowice	P37	2		1	6	5			0.71
2014	Potrzebowice	P37	2			5	5			0.681
2014	Potrzebowice	P38	2			6	5			0.708
2014	Potrzebowice	P39	1			5	5			0.646
2014	Potrzebowice	P39	2			5	6			0.688
2014	Martew	M1	1			4	5			0.647
2014	Martew	M2	1			5	5			0.647
2014	Martew	M2	1			5	6			0.636
2014	Martew	M5	1			5	5			0.66
2014	Martew	M5	1			6	5			0.607
2014	Martew	M5	2		1	5	6			0.697
2014	Martew	M6	2			6	6			0.719
2014	Martew	M7	1			5	6			0.66
2014	Martew	M7	1			5	5			0.649
2014	Martew	M7	1			5	6			0.672
2014	Martew	M7	1			5	5			0.61
2014	Martew	M7	1			5	5			0.617
2014	Martew	M7	2			6	5			0.713
2014	Martew	M7	2			5	5	1		0.701
2014	Martew	M7	2			5	5			0.647
2014	Martew	M7	2			6	5			0.69
2014	Martew	M7	2			7	7			0.71
2014	Martew	M7	2		1	4	5	1		0.628
2014	Martew	M7	2			5	6			0.651
2014	Martew	M8	2			5	6			0.69
2014	Martew	M9	1			6	6			0.661
2014	Martew	M9	2			7	5			0.676
2014	Martew	M9	2			6	5			0.675
2014	Martew	M9	2			7	5			0.638
2014	Martew	M10	2			5	6	1		0.675
2014	Martew	M10	2		1	5	6			0.673
2014	Martew	M10	2			5	6			0.704
2014	Martew	M10	2			6	5			0.695
2014	Martew	M10	2			5	4	1		0.665
2014	Martew	M11	2			4	5			0.613
2014	Martew	M11	2			5	5			0.756
2014	Martew	M12	1			5	6			0.65
2014	Martew	M12	2			6	6			0.65
2014	Martew	M12	2		1	7	6	2		0.721
2014	Martew	M12	2			5	6			0.673
2014	Martew	M12	2			5	5			0.661
2014	Martew	M12	2		1	5	5			0.634
2014	Martew	M12	2			5	5			0.668
2014	Martew	M13	1			4	4			0.637
2014	Martew	M13	2			6	5			0.676
2014	Martew	M13	2			5	5			0.645
2014	Martew	M13	2			5	5			0.702
2014	Martew	M14	1			5	5			0.61
2014	Martew	M14	1			5	5			0.662
2014	Martew	M14	1			5	6			0.66
2014	Martew	M14	1			6	5	1		0.65
2014	Martew	M14	2		1	5	6			0.723
2014	Martew	M14	2			6	6			0.643
2014	Martew	M14	2			5	6	1		0.649
2014	Martew	M14	2			5	6			0.705
2014	Martew	M14	2			5	6			0.71
2014	Martew	M14	2			7	5			0.722
2014	Martew	M14	2			8	7			0.675
2014	Martew	M14	2			4	5			0.708
2014	Martew	M15	1			6	5			0.658
2014	Martew	M15	1			5	5			0.683
2014	Martew	M15	2			5	5			0.635
2014	Martew	M15	2			5	5			0.667
2014	Martew	M15	2			5	5			0.697
2014	Martew	M15	2			5	5			0.675
2014	Martew	M15	2			5	6			0.646
2014	Martew	M15	2		1	6	5	1		0.67
2014	Martew	M15	2			5	5			0.689
2014	Martew	M16	1			5	5			0.665
2014	Martew	M16	2			6	6			0.647
2014	Martew	M16	2			6	6			0.69
2014	Martew	M17	2		1	7	7			0.67
2014	Martew	M17	2			5	5			0.694
2014	Martew	M17	2			5	5			0.698
2014	Martew	M17	2		2	6	5	4		0.664
2014	Martew	M18	1			5	5			0.65
2014	Martew	M19	1			5	5	1		0.643
2014	Martew	M19	1			6	6			0.677
2014	Martew	M19	1			6	5			0.652
2014	Martew	M19	1			5	5			0.644
2014	Martew	M19	1			6	6			0.664
2014	Martew	M19	2		1	7	7			0.687
2014	Martew	M19	2			6	5			0.727
2014	Martew	M19	2			6	5			0.713
2014	Martew	M19	2			5	5			0.69
2014	Martew	M19	2			5	5			0.673
2014	Martew	M19	2			5	5			0.681
2014	Martew	M19	2			5	5			0.692
2014	Martew	M19	2		1	6	6	1		0.695
2014	Martew	M19	2			6	7			0.65
2014	Martew	M19	2			5	6			0.686
2014	Martew	M41	1			4	4			0.575
2014	Martew	M41	2			6	5			0.65
2014	Martew	M41	2			5	5	1		0.663
2014	Martew	M41	2		1	5	5			0.676
2014	Martew	M46	1			6	6			0.65
2014	Martew	M46	1			6	5			0.654
2014	Martew	M46	2			5	5			0.664
2014	Martew	M47	2			5	6			0.713
2014	Martew	M48	1			5	5			0.63
2014	Martew	M48	2			8	6			0.655
2014	Martew	M48	2			6	5			0.687
2014	Martew	M49	2			6	6			0.653
2014	Martew	M51	2			5	5			0.634
2014	Martew	M51	2			6	6			0.654
2014	Martew	M51	2			6	7			0.698
2014	Martew	M51	2			5	5			0.655
2014	Martew	M51	2			5	6			0.686
2014	Martew	M53	2			5	5			0.687
2014	Martew	M54	2		1	6	5			0.683
2014	Martew	M54	2			6	6			0.732
2014	Martew	M54	2			5	6			0.685
2014	Martew	M56	2			5	6			0.656
2014	Martew	M56	2			5	6			0.647
2014	Martew	M59	2			6	8			0.668
2014	Martew	M60	1			5	4			0.614
2014	Martew	M60	2		1	6	5	1		0.694
2014	Martew	M60	2			5	6			0.69
2014	Martew	M60	2			6	6			0.64
2014	Martew	M60	2			6	6			0.685
2014	Martew	M60	2			5	5			0.707
2014	Martew	M64	1			6	5			0.603
2014	Martew	M64	2			5	5			0.714
2014	Martew	M64	2			5	5			0.706
2014	Martew	M64	2			6	5			0.714
2014	Martew	M64	2			5	6			0.669
2014	Martew	M64	2		2	9	7	1		0.703
2014	Martew	M64	2			6	5			0.654
2014	Martew	M67	1			4	5			0.647
2014	Martew	M67	1			7	6			0.645
2014	Martew	M67	1			6	5			0.641
2014	Martew	M67	1			6	5			0.636
2014	Martew	M69	1			5	5			0.676
2014	Martew	M69	2			6	6			0.69
2014	Martew	M70	1			5	5			0.65
2014	Martew	M70	2			5	5			0.622
2014	Martew	M72	1			6	6			0.678
2014	Martew	M72	1			6	6			0.658
2014	Martew	M72	2		1	6	5			0.676
2014	Martew	M72	2			6	5			0.704
2014	Martew	M72	2			5	4			0.685
2014	Martew	M72	2			5	4			0.648
2014	Martew	M73	1			5	5			0.664
2014	Martew	M73	2		1	5	6			0.676
2014	Martew	M74	1			6	6			0.638
2014	Martew	M74	1			7	7			0.644
2014	Martew	M74	1			5	5			0.627
2014	Martew	M74	1	damaged	damaged	damaged	7			0.634
2014	Martew	M74	2			6	6			0.694
2014	Martew	M74	2			6	6			0.644
2014	Martew	M74	2			5	6			0.69
2014	Martew	M74	2			5	5			0.656
2014	Martew	M75	2			5	5			0.672
2014	Martew	M75	2			5	5			0.659
2014	Martew	M75	2			5	5			0.7
2014	Martew	M76	1			5	6			0.641
2014	Martew	M76	2			5	6			0.703
2014	Martew	M76	2			6	5			0.726
2014	Martew	M76	2			5	6			0.64
2014	Martew	M78	1			5	6			0.646
2014	Martew	M78	2			4	5			0.665
2014	Martew	M78	2			5	5			0.703
2014	Martew	M78	2			6	6	1	1	0.689
2014	Martew	M78	2			5	6	1		0.624
2014	Martew	M79	2			5	5			0.664
2014	Martew	M79	2			6	5			0.666
2014	Martew	M80	1			6	5			0.665
2014	Martew	M80	2		1	7	6			0.706
2014	Martew	M80	?			6	6			0.622
2014	Martew	M80	?			5	5			0.641
2014	Martew	M81	1			5	5			0.645
2014	Martew	M81	2			5	5			0.696
2014	Martew	M81	2		1	5	6	1		0.675
2014	Martew	M83	2			5	7	1		0.684
2014	Martew	M83	1			5	5			0.657
2014	Martew	M84	1			6	5			0.649
2014	Martew	M84	1			6	6			0.652
2014	Martew	M84	1			5	5			0.661
2014	Martew	M84	1		1	6	5			0.665
2014	Martew	M84	2			5	5			0.673
2014	Martew	M84	2			5	5			damaged
2014	Martew	M84	2			5	5			0.67
2014	Martew	M84	2			5	5			0.688
2014	Martew	M84	2			5	5	1		0.643
2014	Martew	M84	2			5	5			0.705
2014	Martew	M85	2			5	6			0.673
2014	Martew	M85	2			6	5			0.664
2014	Martew	M85	2			6	5			0.692
2014	Martew	M85	2			7	6			0.628
2014	Martew	M86	2			5	5			0.643
2014	Martew	M88	2			5	7			0.666
2014	Martew	M88	2			6	5			0.687
2014	Martew	M88	2			5	6			0.657
2014	Martew	M89	1			5	5			0.649
2014	Martew	M89	1			5	5			0.664
2014	Martew	M89	1			7	6			0.64
2014	Martew	M89	1			6	5			0.625
2014	Martew	M89	1			6	6			0.676
2014	Martew	M89	1			5	4			0.643
2014	Martew	M89	1			6	6			0.655
2014	Martew	M89	1			6	6			0.639
2014	Martew	M89	1			5	4			0.665
2014	Martew	M89	1			6	5			0.688
2014	Martew	M89	1			7	7			0.671
2014	Martew	M89	1			5	5			0.646
2014	Martew	M89	1			6	5			0.602
2014	Martew	M89	1			6	5			0.613
2014	Martew	M89	1			5	5			0.688
2014	Martew	M89	2			6	6			0.667
2014	Martew	M89	2		1	6	5			0.716
2014	Martew	M89	2			5	5			0.645
2014	Martew	M89	2		2	7	7	2		0.71
2014	Martew	M89	2			6	5			0.71
2014	Martew	M89	2			5	5	1		0.615
2014	Martew	M89	2			5	7			0.672
2014	Martew	M89	2			6	5			0.705
2014	Martew	M89	2			5	5			0.678
2014	Martew	M89	2			5	6			0.643
2014	Martew	M89	2			5	6			0.676
2014	Martew	M89	2			5	5			0.68
2014	Martew	M89	2			7	6			0.644
2014	Martew	M89	2			6	6			0.67
2014	Martew	M89	2			5	6			0.656
2014	Martew	M89	2			5	5			0.716
2014	Martew	M89	2			5	5			0.674
2014	Martew	M91	1			5	6			0.656
2014	Martew	M91	1			6	6			0.657
2014	Martew	M91	1			6	5	2		0.6
2014	Martew	M91	1			5	5			0.623
2014	Martew	M91	2			6	5	2		0.65
2014	Martew	M91	2			6	6			0.693
2014	Martew	M91	2			5	6			0.707
2014	Martew	M91	2		1	7	5			0.643
2014	Martew	M91	2		1	5	5			0.653
2014	Martew	M91	2		2	5	7	1		0.715
2014	Martew	M91	2			6	6			0.635
2014	Martew	M92a	2			5	5			0.684
2015	Krzywda	KD1	1			5	4			0.606
2015	Krzywda	KG1	1	missing	missing	missing	missing	missing	missing	missing
2015	Krzywda	KG1	1			5	4			0.647
2015	Krzywda	KG1	1			5	5			0.64
2015	Krzywda	KG1	1			6	6			0.64
2015	Krzywda	KG1	1			6	6	1		0.656
2015	Krzywda	KG1	1			6	6			0.67
2015	Krzywda	KG1	2			5	6			0.615
2015	Krzywda	KG1	2			8	7			0.676
2015	Krzywda	KG1	2			6	5			0.657
2015	Krzywda	KG1	2			5	5			0.713
2015	Krzywda	KG1	2			6	6			0.628
2015	Krzywda	KG1	2		1	6	5			0.651
2015	Krzywda	KG1	2			5	5			0.658
2015	Krzywda	KG2	1			6	5			0.671
2015	Krzywda	K14-1	1			5	6			0.633
2015	Krzywda	K14-1	1			5	5			0.563
2015	Krzywda	K14-1	1			6	6			0.622
2015	Krzywda	K14-1	2		1	6	7			0.688
2015	Krzywda	K14-1	2			6	6			0.704
2015	Krzywda	K14-1	2			4	5			0.695
2015	Krzywda	K14-1	2		2	5	5	2		0.695
2015	Krzywda	K14-1	2			6	4			0.65
2015	Krzywda	K14-1	2			5	6			0.642
2015	Krzywda	K14-2	1			5	5			0.621
2015	Krzywda	K14-2	1			5	5			0.673
2015	Krzywda	K14-2	1			5	5			0.658
2015	Krzywda	K14-2	2			5	5	1		0.635
2015	Krzywda	K14-2	2			5	5			0.646
2015	Krzywda	K14-2	2			6	6			0.673
2015	Krzywda	K14-2	2			5	5			0.636
2015	Krzywda	K14-2	2			5	5	1		0.649
2015	Krzywda	K14-2	2			5	5			0.668
2015	Krzywda	K14-2	2			7	7			0.637
2015	Krzywda	K14-3	1		1	5	6			0.631
2015	Krzywda	K14-3	1			7	7			0.659
2015	Krzywda	K14-3	1			7	6	1		0.683
2015	Krzywda	K14-3	1			5	5			0.629
2015	Krzywda	K14-3	1			5	6			0.678
2015	Krzywda	K14-3	1			5	5			0.682
2015	Krzywda	K14-3	1			6	7			0.646
2015	Krzywda	K14-3	2			6	5			0.595
2015	Krzywda	K14-3	2		1	5	4	1		0.631
2015	Krzywda	K14-3	2			5	6			0.654
2015	Krzywda	K14-3	2			5	5			0.615
2015	Krzywda	K14-3	2		2	6	6	2		0.627
2015	Krzywda	K14-3	2			7	7			0.676
2015	Krzywda	K14-3	2			5	4			0.675
2015	Krzywda	K14-3	2			6	5			0.68
2015	Krzywda	K14-3	2			5	4			0.689
2015	Krzywda	K14-3	2			5	5			0.603
2015	Krzywda	K14-3	2		1	7	5			0.69
2015	Krzywda	K16-1	1			6	5			0.641
2015	Krzywda	K16-1	1			5	5			0.677
2015	Krzywda	K16-1	1			5	5	1		0.66
2015	Krzywda	K16-1	1			5	5			0.626
2015	Krzywda	K16-1	1			4	5			0.657
2015	Krzywda	K16-1	1			7	7			0.632
2015	Krzywda	K16-1	1			5	5	1		0.665
2015	Krzywda	K16-1	2		1	5	5			0.674
2015	Krzywda	K16-1	2			5	5			0.643
2015	Krzywda	K16-1	2			8	7	1		0.71
2015	Krzywda	K16-1	2			5	6			0.703
2015	Krzywda	K16-2	2			5	5			0.654
2015	Krzywda	K16-2	2			5	6			0.7
2015	Krzywda	K16-3	2			6	7			0.677
2015	Krzywda	K20-1	2			5	6			0.643
2015	Krzywda	K20-1	2			5	5			0.672
2015	Krzywda	K20-1	2			5	6			0.676
2015	Krzywda	K21-2	1			6	6			0.64
2015	Krzywda	K21-3	1		1	5	6	1		0.651
2015	Krzywda	K21-3	1			5	6			0.642
2015	Krzywda	K21-3	1			5	5			0.665
2015	Krzywda	K21-3	1			6	6			0.65
2015	Krzywda	K21-3	1			5	5			0.658
2015	Krzywda	K21-3	1			5	6			0.657
2015	Krzywda	K21-3	1			5	5			0.66
2015	Krzywda	K21-3	1			5	5			0.629
2015	Krzywda	K21-3	1			6	6			0.665
2015	Krzywda	K21-3	2			5	5	1		0.69
2015	Krzywda	K21-3	2			6	5			0.648
2015	Krzywda	K21-3	2			5	5			0.712
2015	Krzywda	K21-3	2			6	6	1	1	0.681
2015	Krzywda	K21-3	2			6	6			0.675
2015	Krzywda	K21-3	2			6	7	1		0.708
2015	Krzywda	K21-3	2			5	5	1		0.625
2015	Krzywda	K21-3	2			5	5			0.691
2015	Krzywda	K21-3	2			6	6	1		0.717
2015	Krzywda	K35-1	1			6	5			0.67
2015	Krzywda	K35-1	2			7	7			0.666
2015	Krzywda	K35-1	2			5	5			0.674
2015	Krzywda	K35-2	1			6	5			0.641
2015	Krzywda	K35-2	2			6	6			0.648
2015	Krzywda	K35-2	2			6	5	1		0.669
2015	Krzywda	K35-2	2			6	6			0.688
2015	Krzywda	K35-3	1			4	6			0.654
2015	Krzywda	K35-3	1			5	5			0.694
2015	Krzywda	K35-3	2			5	5			0.668
2015	Krzywda	K35-3	2			5	5			0.679
2015	Krzywda	K35-3	2			6	5			0.664
2015	Krzywda	K35-3	2			7	6			0.715
2015	Krzywda	K35-3	2			5	5			0.71
2015	Krzywda	K35-3	2			5	6			0.65
2015	Martew	M1	1			5	6			0.656
2015	Martew	M1	2		1	6	5	1		0.678
2015	Martew	M1	2			5	5			0.698
2015	Martew	M2	1			5	5			0.668
2015	Martew	M2	2			6	5			0.719
2015	Martew	M2	2		1	5	6	1	1	0.695
2015	Martew	M4	2			5	5			0.697
2015	Martew	M4	2			5	6			0.64
2015	Martew	M5	1			5	6			0.673
2015	Martew	M5	2			5	5			0.652
2015	Martew	M5	2			6	6			0.707
2015	Martew	M6	2			4	5			0.719
2015	Martew	M7	1			7	7			0.676
2015	Martew	M7	2			6	6	1		0.659
2015	Martew	M7	2			7	6			0.633
2015	Martew	M7	2			5	6			0.702
2015	Martew	M7	2			7	6			0.684
2015	Martew	M7	2			7	5			0.656
2015	Martew	M8	1			5	5			0.547
2015	Martew	M8	1		1	5	6			0.676
2015	Martew	M8	2		1	6	5			0.665
2015	Martew	M8	2			6	6	1		0.67
2015	Martew	M9	1			4	5			0.638
2015	Martew	M9	1			6	5			0.673
2015	Martew	M9	1			5	6			0.657
2015	Martew	M9	2			5	5			0.675
2015	Martew	M11	2			5	5			0.642
2015	Martew	M11	2			6	8			0.673
2015	Martew	M11	2			5	5			0.662
2015	Martew	M11	2			6	6			0.733
2015	Martew	M12	1			5	5			0.589
2015	Martew	M12	1			5	5			0.654
2015	Martew	M12	2			5	5			0.631
2015	Martew	M12	2			5	5	1		0.683
2015	Martew	M12	2			5	5			0.668
2015	Martew	M13	1			8	6			0.642
2015	Martew	M13	1			5	6			0.656
2015	Martew	M13	1			5	6			0.632
2015	Martew	M13	2		1	6	7	1		0.709
2015	Martew	M13	2			6	6			0.658
2015	Martew	M13	2		3	6	5	1		0.69
2015	Martew	M14	1			5	5			0.651
2015	Martew	M14	1			5	5			0.658
2015	Martew	M14	2			5	6			0.643
2015	Martew	M14	2			5	5			0.68
2015	Martew	M14	2			6	5			0.696
2015	Martew	M14	2			6	6			0.677
2015	Martew	M14	2			5	5			0.682
2015	Martew	M14	2			5	6			0.69
2015	Martew	M14	2			6	5			0.7
2015	Martew	M14	2			4	5			0.713
2015	Martew	M17	1			6	7			0.615
2015	Martew	M17	1			5	6	1		0.657
2015	Martew	M17	1			6	6			0.642
2015	Martew	M17	2		1	6	6			0.715
2015	Martew	M17	2			5	6			0.697
2015	Martew	M17	2			6	5			0.67
2015	Martew	M18	2			7	6			0.69
2015	Martew	M18	2			6	7			0.664
2015	Martew	M19	1			5	5			0.673
2015	Martew	M43	2		1	4	6			0.694
2015	Martew	M43	2			5	5			0.74
2015	Martew	M46	1			6	6	1		0.657
2015	Martew	M46	2			7	7			0.667
2015	Martew	M46	2			4	5			0.686
2015	Martew	M46	2			6	6			0.713
2015	Martew	M46	2		1	5	5			0.676
2015	Martew	M46	2			5	5			0.693
2015	Martew	M46	2			6	6			0.672
2015	Martew	M46	2			6	7			0.615
2015	Martew	M47	1			6	5			0.642
2015	Martew	M47	1			5	5			0.667
2015	Martew	M47	2		1	5	5	1		0.712
2015	Martew	M47	2			6	5			0.69
2015	Martew	M48	2			5	5			0.69
2015	Martew	M48	2			6	5			0.736
2015	Martew	M49	1			6	5			0.634
2015	Martew	M49	2			5	6			0.652
2015	Martew	M49	2			5	5			0.711
2015	Martew	M49	2			5	5			0.665
2015	Martew	M49	2		1	5	6			0.724
2015	Martew	M51	1			6	5			0.678
2015	Martew	M51	1			5	5			0.664
2015	Martew	M51	2			6	7			0.691
2015	Martew	M52	2			6	5			0.709
2015	Martew	M54	1		2	6	5			0.673
2015	Martew	M54	1			7	6			0.66
2015	Martew	M54	1			5	8			0.64
2015	Martew	M54	2			5	6			0.626
2015	Martew	M55	2		1	6	6			0.72
2015	Martew	M56	1			5	5			0.693
2015	Martew	M56	1			7	6			0.656
2015	Martew	M56	1		1	5	5	1		0.667
2015	Martew	M56	1			6	5			0.667
2015	Martew	M56	2			5	5			0.59
2015	Martew	M56	2			6	6			0.744
2015	Martew	M56	2			6	6			0.707
2015	Martew	M56	2			6	6			0.678
2015	Martew	M57	1			5	5			0.646
2015	Martew	M58	2			5	6			0.677
2015	Martew	M59	2			6	6			0.719
2015	Martew	M59	2			5	5			0.719
2015	Martew	M60	2			6	6			0.68
2015	Martew	M60	2			5	5			0.695
2015	Martew	M61	1			5	6			0.653
2015	Martew	M61	2			5	5			0.682
2015	Martew	M61	2			6	5			0.694
2015	Martew	M61	2			6	5			0.694
2015	Martew	M64	1			5	5			0.654
2015	Martew	M64	2			5	6			0.623
2015	Martew	M64	2			5	7			0.681
2015	Martew	M64	2			6	5			0.697
2015	Martew	M66	2			6	5	1		0.656
2015	Martew	M66	2			5	6			0.7
2015	Martew	M67	1			4	5			0.648
2015	Martew	M67	2			7	7			0.722
2015	Martew	M68	1			7	5			0.668
2015	Martew	M68	1			5	5			0.665
2015	Martew	M68	2			5	6			0.672
2015	Martew	M68	2			6	6			0.699
2015	Martew	M68	2			5	5			0.66
2015	Martew	M68	2			6	7			0.686
2015	Martew	M69	1			6	6			0.636
2015	Martew	M69	2			6	5			0.715
2015	Martew	M69	2			8	5			0.684
2015	Martew	M69	2			6	5			0.696
2015	Martew	M69	2			5	4	1		0.67
2015	Martew	M69	2			5	5			0.674
2015	Martew	M71	2			6	6			0.692
2015	Martew	M72	2			5	5			0.694
2015	Martew	M73	1			6	5			0.7
2015	Martew	M73	2		1	7	5			0.693
2015	Martew	M73	2			6	7			0.701
2015	Martew	M74	2			6	6			0.69
2015	Martew	M74	2			6	5			0.665
2015	Martew	M74	2			5	5			0.669
2015	Martew	M74	2			5	7			0.651
2015	Martew	M74	2			5	7			0.652
2015	Martew	M74	2			6	6			0.696
2015	Martew	M75	2		2	7	8			0.698
2015	Martew	M76	1			5	5			0.673
2015	Martew	M76	2			5	4			0.688
2015	Martew	M77	2			6	6	1		0.721
2015	Martew	M79	1			5	5			0.663
2015	Martew	M79	1			6	6			0.642
2015	Martew	M79	1			6	5			0.597
2015	Martew	M79	1			6	6			0.674
2015	Martew	M79	1			5	5			0.611
2015	Martew	M79	1			5	6			0.657
2015	Martew	M79	2			5	5			0.688
2015	Martew	M79	2			5	6	2		0.653
2015	Martew	M79	2		2	5	5	1		0.679
2015	Martew	M79	2			5	5			0.681
2015	Martew	M80	1			5	5			0.59
2015	Martew	M80	1		1	5	5	1		0.648
2015	Martew	M80	2			6	4			0.666
2015	Martew	M80	2			5	5			0.688
2015	Martew	M80	2			5	5			0.732
2015	Martew	M80	2			6	5			0.7
2015	Martew	M81	2		1	6	7	1		0.675
2015	Martew	M81	2			5	6			0.688
2015	Martew	M81	2			5	6			0.66
2015	Martew	M82	1			5	6			0.643
2015	Martew	M82	2			5	5			0.699
2015	Martew	M82	2			6	5			0.715
2015	Martew	M82	2		1	5	6			0.64
2015	Martew	M82	2		1	7	8			0.711
2015	Martew	M82	2			6	5			0.714
2015	Martew	M82	2			6	missing	missing	missing	missing
2015	Martew	M83	2			5	5	1		0.66
2015	Martew	M83	2			5	5			0.708
2015	Martew	M83	2			6	5			0.693
2015	Martew	M84	1			5	5			0.65
2015	Martew	M84	1			6	5			0.597
2015	Martew	M84	1	missing	missing	missing	6			0.646
2015	Martew	M84	1			5	5			0.666
2015	Martew	M84	1			5	5			0.659
2015	Martew	M84	1			4	6			0.67
2015	Martew	M84	1			5	5			0.647
2015	Martew	M84	2			5	4			0.664
2015	Martew	M84	2			5	6			0.654
2015	Martew	M84	2		2	5	6	1		0.698
2015	Martew	M84	2			6	6			0.727
2015	Martew	M84	2			6	5			0.649
2015	Martew	M84	2			6	8			0.659
2015	Martew	M84	2			5	5			0.67
2015	Martew	M84	2			5	5			0.682
2015	Martew	M84	2			6	6	1		0.694
2015	Martew	M84	2			5	5			0.721
2015	Martew	M86	1			5	5			0.669
2015	Martew	M86	1			7	6			0.64
2015	Martew	M86	2			5	5			0.604
2015	Martew	M86	2			6	5			0.674
2015	Martew	M86	2			6	5			0.683
2015	Martew	M86	2			5	5			0.694
2015	Martew	M86	2			7	10			0.688
2015	Martew	M86	2			5	5			0.686
2015	Martew	M86	2			6	6			0.721
2015	Martew	M86	2			7	6			0.651
2015	Martew	M89	1			5	5			0.6
2015	Martew	M89	1			5	5			0.679
2015	Martew	M89	2			7	6			0.695
2015	Martew	M89	2			6	5			0.712
2015	Martew	M89	2			5	5			0.651
2015	Martew	M89	2			6	5			0.624
2015	Martew	M89	2			6	5			0.676
2015	Martew	M90	2			5	6			0.664
2015	Martew	M90	2			4	5			0.723
2015	Martew	M90	2			5	5		1	0.678
2015	Martew	M91	1			5	5			0.63
2015	Martew	M91	1			5	5			0.647
2015	Martew	M91	1			6	5			0.598
2015	Martew	M91	1			5	5			0.637
2015	Martew	M91	1			5	6			0.642
2015	Martew	M91	1		1	5	5			0.648
2015	Martew	M91	1			5	6			0.647
2015	Martew	M91	1			6	5			0.668
2015	Martew	M91	1			6	6			0.652
2015	Martew	M91	1			6	7			0.666
2015	Martew	M91	1			6	5	1		0.668
2015	Martew	M91	1			5	4			0.634
2015	Martew	M91	1			6	5			0.658
2015	Martew	M91	1			5	5			0.663
2015	Martew	M91	1			5	5			0.653
2015	Martew	M91	1			5	5			0.676
2015	Martew	M91	2			5	5	1		0.724
2015	Martew	M91	2			4	4	1		0.664
2015	Martew	M91	2			6	5			0.653
2015	Martew	M91	2			5	5			0.69
2015	Martew	M91	2			5	6			0.641
2015	Martew	M91	2			5	5			0.683
2015	Martew	M91	2		1	6	6			0.648
2015	Martew	M91	2			5	5	1		0.703
2015	Martew	M91	2			5	5			0.658
2015	Martew	M91	2			5	5			0.686
2015	Martew	M92	2			5	5			0.664
2015	Martew	M92	2			6	6			0.663
2015	Martew	M92a	1			6	5			0.65
2015	Martew	M92a	1			7	6			0.673
2015	Martew	M92a	1			5	5			0.625
2015	Martew	M92a	2		1	5	5			0.687
2015	Martew	M92a	2			5	5			0.686
2015	Martew	M93	1			5	5			0.622
2015	Martew	M93	2		1	5	6			0.666
2015	Martew	M93	2			6	5	1		0.679
2015	Potrzebowice	P1	2			5	6			0.667
2015	Potrzebowice	P3	1			5	6			0.649
2015	Potrzebowice	P3	2			7	6			0.714
2015	Potrzebowice	P6	2			5	5	1		0.668
2015	Potrzebowice	P6	2			5	5			0.652
2015	Potrzebowice	P8'	2			6	6			0.598
2015	Potrzebowice	P8''	1			5	6			0.64
2015	Potrzebowice	P9	1			5	5			0.677
2015	Potrzebowice	P10	1			5	5			0.615
2015	Potrzebowice	P11	1			6	5			0.624
2015	Potrzebowice	P11	2			5	5			0.669
2015	Potrzebowice	P11	2			5	6			0.616
2015	Potrzebowice	P11	2		1	5	5	1		0.642
2015	Potrzebowice	P11	2			5	5			0.7
2015	Potrzebowice	P11	2		2	6	6			0.677
2015	Potrzebowice	P11	2			6	5			0.743
2015	Potrzebowice	P12	1			6	5			0.673
2015	Potrzebowice	P12	1			4	5			0.684
2015	Potrzebowice	P13	2			5	5			0.659
2015	Potrzebowice	P14	2			5	5			0.672
2015	Potrzebowice	P17	1			5	5			0.699
2015	Potrzebowice	P17	2			6	7			0.673
2015	Potrzebowice	P20	2			7	7			0.712
2015	Potrzebowice	P21	2			5	7			0.698
2015	Potrzebowice	P22	2			6	7	1		0.646
2015	Potrzebowice	P22	2			6	5			0.736
2015	Potrzebowice	P23	2		1	6	5			0.722
2015	Potrzebowice	P24	1			6	6			0.672
2015	Potrzebowice	P24	2			5	5			0.641
2015	Potrzebowice	P24	2			5	6			0.698
2015	Potrzebowice	P24	2			7	5			0.64
2015	Potrzebowice	P32	1			6	6			0.621
2015	Potrzebowice	P32	1			5	5			0.665
2015	Potrzebowice	P32	1			5	6			0.626
2015	Potrzebowice	P32	1		1	7	6	1		0.653
2015	Potrzebowice	P32	2		1	5	4	1		0.673
2015	Potrzebowice	P33	1			6	6			0.672
2015	Potrzebowice	P34	1			5	5			0.64
2015	Potrzebowice	P34	1			4	5			0.658
2015	Potrzebowice	P35	1			5	5			0.646
2015	Potrzebowice	P35	2			5	6			0.693
2015	Potrzebowice	P36	1			5	5			0.658
2015	Potrzebowice	P37	2			5	5			0.6
2015	Potrzebowice	P38	2			6	6			0.716
2015	Potrzebowice	P38	2			4	6			0.647
2015	Potrzebowice	P38	2			5	6			0.666
2015	Potrzebowice	P38	2		2	5	5	1		0.648
2015	Potrzebowice	P38	2			5	5			0.663
2015	Potrzebowice	P39	1			5	6			0.653
2015	Potrzebowice	P39	2			5	5	1		0.654
2015	Potrzebowice	SzW	2			5	5			0.632
2015	Kaczory	Ka1-1	2		1	5	5	1		0.684
2015	Kaczory	Ka1-1	2			5	5			0.667
2015	Kaczory	Ka1-1	2			5	5			0.691
2015	Kaczory	Ka1-2	2			5	5			0.674
2015	Kaczory	Ka1-2	2			6	5			0.708
2015	Kaczory	Ka2-2	2		1	6	6			0.708
2015	Zdrojowa Góra	Z1-1	2		1	5	5	1		0.655
2015	Zdrojowa Góra	Z1-2	2			5	5			0.55
2015	Zdrojowa Góra	Z1-2	2			5	6			0.698
2015	Zdrojowa Góra	Z1-3	1			5	6			0.633
2015	Zdrojowa Góra	Z2-1	2			5	5			0.691
2015	Zdrojowa Góra	Z2-1	2		1	7	missing	missing	missing	missing
2015	Zdrojowa Góra	Z2-3	1			5	5			0.657
2015	Zdrojowa Góra	Z2-3	2			7	5			0.642
2015	Zdrojowa Góra	Z2-3	2			6	5			0.677
2015	Zdrojowa Góra	Z2-3	2			6	5	1		0.713
2015	Trzcianka	T2-3	2			6	5			0.69
2015	Trzcianka	T2-3	2			6	7	1		0.706
2016	Krzywda	KD1	2		2	5	5	1		0.661
2016	Krzywda	K16-1	1			5	5			0.677
2016	Krzywda	K16-2	2			6	5			0.694
2016	Krzywda	K16-2	2			7	6			0.687
2016	Krzywda	K14-1	1			5	6			0.686
2016	Krzywda	K14-1	1		1	5	5			0.646
2016	Krzywda	K14-1	1			5	5			0.671
2016	Krzywda	K14-1	1			7	6			0.646
2016	Krzywda	K14-1	1			5	4			0.65
2016	Krzywda	K14-1	1			5	5			0.613
2016	Krzywda	K14-1	1			5	6			0.636
2016	Krzywda	K14-1	1			6	5			0.622
2016	Krzywda	K14-1	1			5	5			0.638
2016	Krzywda	K14-1	2			6	5			0.621
2016	Krzywda	K14-1	2			5	5			0.602
2016	Krzywda	K14-1	2		2	5	5	2		0.682
2016	Krzywda	K14-1	2			6	5			0.705
2016	Krzywda	K14-1	2			5	6	1		0.711
2016	Krzywda	K14-1	2		1	6	6			0.694
2016	Krzywda	K14-2	1			6	5			0.63
2016	Krzywda	K14-2	1			5	5			0.644
2016	Krzywda	K14-2	1			5	5			0.645
2016	Krzywda	K14-2	1		1	6	5			0.635
2016	Krzywda	K14-2	2			5	5			0.647
2016	Krzywda	K14-2	2			6	5			0.674
2016	Krzywda	K14-3	1			6	6			0.654
2016	Krzywda	K20-1	2			6	5			0.625
2016	Krzywda	K20-1	2			5	5			0.721
2016	Krzywda	K20-2	2			5	5			0.685
2016	Krzywda	K20-3	2		1	6	7			0.683
2016	Krzywda	K21-1	1			5	6			0.648
2016	Krzywda	K21-1	1			5	5			0.644
2016	Krzywda	K21-1	2			7	7			0.686
2016	Krzywda	K21-1	2			6	5			0.653
2016	Krzywda	K21-1	2			5	6			0.7
2016	Krzywda	K21-1	2			5	5			0.662
2016	Krzywda	K21-2	1			6	6			0.672
2016	Krzywda	K21-2	1			5	4			0.661
2016	Krzywda	K21-2	2			4	6	1		0.68
2016	Krzywda	K21-2	2			5	5			0.693
2016	Krzywda	K21-2	2			5	5			0.698
2016	Krzywda	K21-2	2			6	5			0.675
2016	Krzywda	K21-3	1		1	9	6	1		0.653
2016	Krzywda	K21-3	1			5	5	1		0.658
2016	Krzywda	K21-3	1			5	5			0.647
2016	Krzywda	K21-3	1			5	5			0.665
2016	Krzywda	K21-3	1			5	6			0.675
2016	Krzywda	K21-3	2			6	5			0.683
2016	Krzywda	K21-3	2			6	6			0.674
2016	Krzywda	K21-3	2			5	5	1		0.678
2016	Krzywda	K35-1	1			5	5			0.643
2016	Krzywda	K35-1	1		1	5	5			0.633
2016	Krzywda	K35-1	1			6	6			0.648
2016	Krzywda	K35-2	1			5	5			0.69
2016	Krzywda	K35-2	1		1	6	6	1		0.633
2016	Krzywda	K35-3	2		1	7	7			0.647
2016	Krzywda	K35-3	2			6	7			0.6
2016	Martew	M1	1			6	6			0.666
2016	Martew	M1	1			8	5			0.629
2016	Martew	M1	2			6	5			0.665
2016	Martew	M1	2			6	5			0.622
2016	Martew	M2	1			5	4			0.655
2016	Martew	M2	1			6	6			0.654
2016	Martew	M2	2			5	5			0.726
2016	Martew	M5	1			5	5			0.647
2016	Martew	M5	2			5	5			0.711
2016	Martew	M5	2			5	5			0.678
2016	Martew	M7	2			5	5			0.706
2016	Martew	M7	2			5	5			0.642
2016	Martew	M9	2			5	5			0.635
2016	Martew	M10	1			5	6			0.644
2016	Martew	M10	2		2	5	7			0.699
2016	Martew	M10	2			5	6			0.688
2016	Martew	M11	2			5	5			0.658
2016	Martew	M11	2			5	6	1		0.669
2016	Martew	M11	2			6	6			0.707
2016	Martew	M11	2		1	5	6	1		0.671
2016	Martew	M11	2			5	5			0.649
2016	Martew	M11	2		2	8	6	1		0.723
2016	Martew	M12	1			6	5			0.646
2016	Martew	M12	2			5	5			0.729
2016	Martew	M13	1			5	6			0.638
2016	Martew	M13	1			4	5			0.627
2016	Martew	M13	1			5	6			0.646
2016	Martew	M13	1			5	6			0.681
2016	Martew	M13	1			5	5			0.662
2016	Martew	M13	2			5	5			0.661
2016	Martew	M13	2			6	5			0.66
2016	Martew	M13	2		1	6	6	1		0.652
2016	Martew	M14	1		1	7	6			0.65
2016	Martew	M14	2			5	5			0.66
2016	Martew	M14	2			4	4			0.672
2016	Martew	M14	2			6	8			0.698
2016	Martew	M15	2			6	6			0.648
2016	Martew	M15	2			5	6			0.671
2016	Martew	M15	2			6	5	1		0.662
2016	Martew	M16	1			5	5			0.652
2016	Martew	M16	1			5	5			0.636
2016	Martew	M16	2			6	5			0.64
2016	Martew	M17	1			6	5			0.653
2016	Martew	M17	2		1	6	5			0.651
2016	Martew	M17	2			5	6			0.675
2016	Martew	M17	2			6	6			0.731
2016	Martew	M17	2			5	5			0.624
2016	Martew	M17	2		1	6	5	1		0.633
2016	Martew	M17	2			5	5	1		0.642
2016	Martew	M17	2			5	6			0.751
2016	Martew	M19	1			5	6			0.643
2016	Martew	M19	2			6	5			0.669
2016	Martew	M41	2			5	5			0.645
2016	Martew	M43	2			5	5			0.678
2016	Martew	M46	1		1	7	7			0.66
2016	Martew	M46	1			5	5			0.648
2016	Martew	M46	2			5	6	1		0.682
2016	Martew	M46	2			5	5			0.647
2016	Martew	M46	2			5	4	1		0.696
2016	Martew	M48	2			6	6	1		0.66
2016	Martew	M49	1			5	5			0.66
2016	Martew	M49	2			4	5			0.65
2016	Martew	M56	2			5	6			0.67
2016	Martew	M61	1			6	5			0.645
2016	Martew	M61	1			5	5			0.641
2016	Martew	M61	2			5	5			0.695
2016	Martew	M64	2			5	5			0.688
2016	Martew	M66	2			6	6	1		0.643
2016	Martew	M66	?			5	6			0.673
2016	Martew	M67	1		1	5	5	2		0.67
2016	Martew	M67	1			5	5			0.651
2016	Martew	M67	1			4	4			0.672
2016	Martew	M67	1			5	6			0.643
2016	Martew	M67	2			6	6			0.696
2016	Martew	M67	2			5	5	1		0.675
2016	Martew	M67	2			7	6			0.704
2016	Martew	M68	1			5	6			0.631
2016	Martew	M69	2		1	7	6			0.673
2016	Martew	M69	2			6	5			0.697
2016	Martew	M72	1			5	5			0.63
2016	Martew	M72	1			5	5			0.646
2016	Martew	M73	1			5	5			0.643
2016	Martew	M73	1			5	5			0.626
2016	Martew	M73	2			7	7			0.701
2016	Martew	M73	2			5	6			0.66
2016	Martew	M73	2			6	6			0.71
2016	Martew	M73	2			5	6			0.711
2016	Martew	M74	1			5	6			0.658
2016	Martew	M74	2			6	6			0.659
2016	Martew	M74	2			5	5			0.667
2016	Martew	M74	2			5	7			0.7
2016	Martew	M75	2			6	5			0.695
2016	Martew	M76	2			6	5			0.7
2016	Martew	M76	2			5	6			0.643
2016	Martew	M76	2			5	6			0.691
2016	Martew	M78	1			5	5			0.69
2016	Martew	M78	1			6	7			0.633
2016	Martew	M78	1			5	5			0.627
2016	Martew	M78	1			5	5			0.628
2016	Martew	M78	1			5	5			0.666
2016	Martew	M78	2			6	4			0.646
2016	Martew	M78	2			5	5			0.691
2016	Martew	M78	2			6	5			0.658
2016	Martew	M78	2			5	5			0.694
2016	Martew	M78	2			6	6			0.688
2016	Martew	M78	2			5	6			0.666
2016	Martew	M78	2			5	5			0.657
2016	Martew	M78	2			6	5			0.657
2016	Martew	M78	2			5	4	1		0.666
2016	Martew	M78	2			5	5			0.706
2016	Martew	M79	1			6	7			0.67
2016	Martew	M79	1			6	5			0.66
2016	Martew	M79	1			5	5			0.647
2016	Martew	M79	1	missing	missing	missing	missing	missing	missing	missing
2016	Martew	M79	2			5	4			0.623
2016	Martew	M80	2			5	5			0.633
2016	Martew	M80	2			7	missing	missing	missing	missing
2016	Martew	M82	2			5	5			0.68
2016	Martew	M83	2			5	6			0.625
2016	Martew	M83	2	missing	missing	missing	5			0.669
2016	Martew	M84	1			5	5			0.637
2016	Martew	M84	2			5	4			0.718
2016	Martew	M84	2		2	6	6	2	1	0.66
2016	Martew	M84	2			5	5	1		0.722
2016	Martew	M85	1			5	5			0.69
2016	Martew	M85	2			7	6	1		0.694
2016	Martew	M86	1			5	5			0.7
2016	Martew	M86	2			6	6			0.68
2016	Martew	M86	2			6	5			0.703
2016	Martew	M86	2			5	7			0.712
2016	Martew	M87	1			5	5			0.65
2016	Martew	M87	1		1	5	5			0.637
2016	Martew	M87	2		2	5	4			0.574
2016	Martew	M89	1			5	5			0.631
2016	Martew	M89	2			7	7	1		0.666
2016	Martew	M91	1		1	5	5	2		0.616
2016	Martew	M91	1			5	5			0.652
2016	Martew	M91	1			5	5			0.624
2016	Martew	M91	2			5	6			0.705
2016	Martew	M91	2			5	6			0.655
2016	Martew	M91	2			6	6			0.704
2016	Martew	M91	2			6	6			0.63
2016	Martew	M91	2			5	6			0.65
2016	Martew	M91	2			5	5			0.688
2016	Martew	M91	2		1	5	6	1		0.641
2016	Martew	M91	2			6	6			0.679
2016	Martew	M91	2			5	5	1		0.636
2016	Martew	M93	2			6	5			0.734
2016	Martew	M93	2			5	5			0.673
2016	Martew	M93	2		1	7	7			0.652
2016	Potrzebowice	P1	1			6	6			0.668
2016	Potrzebowice	P1	1			7	5			0.669
2016	Potrzebowice	P1	1			5	5			0.66
2016	Potrzebowice	P1	1			5	5			0.652
2016	Potrzebowice	P1	2			5	5			0.726
2016	Potrzebowice	P1	2			5	5			0.682
2016	Potrzebowice	P1	2			5	5			0.646
2016	Potrzebowice	P1	2			5	5			0.674
2016	Potrzebowice	P1	2			5	5			0.697
2016	Potrzebowice	P1	2			7	7			0.679
2016	Potrzebowice	P1	2			8	8			0.673
2016	Potrzebowice	P2	1			4	5			0.658
2016	Potrzebowice	P2	1			7	7			0.654
2016	Potrzebowice	P2	1			5	4			0.642
2016	Potrzebowice	P2	2		1	6	7			0.662
2016	Potrzebowice	P2	2			6	7			0.688
2016	Potrzebowice	P2	2			6	6			0.7
2016	Potrzebowice	P5	1			6	5			0.686
2016	Potrzebowice	P5	2			6	5			0.691
2016	Potrzebowice	P5	2		2	7	7			0.669
2016	Potrzebowice	P7	1		1	5	6			0.672
2016	Potrzebowice	P7	2		1	5	5			0.705
2016	Potrzebowice	P7	2			5	5			0.669
2016	Potrzebowice	P7	2			6	8			0.682
2016	Potrzebowice	P8'	1			5	8			0.652
2016	Potrzebowice	P8"	1			5	6			0.614
2016	Potrzebowice	P8"	1			5	5	1		0.652
2016	Potrzebowice	P8"	1			5	5			0.65
2016	Potrzebowice	P8"	1			5	5			0.589
2016	Potrzebowice	P8"	2			6	5			0.633
2016	Potrzebowice	P9	2			5	5			0.676
2016	Potrzebowice	P9	2			6	6			0.705
2016	Potrzebowice	P10	1			4	4			0.672
2016	Potrzebowice	P10	2			6	6			0.701
2016	Potrzebowice	P11	1			5	6	1		0.667
2016	Potrzebowice	P11	1			6	6			0.665
2016	Potrzebowice	P11	2			5	5			0.655
2016	Potrzebowice	P11	2		1	7	6	1		0.658
2016	Potrzebowice	P11	2			5	5			0.669
2016	Potrzebowice	P12	2		1	5	6			0.713
2016	Potrzebowice	P13	2			5	5			0.621
2016	Potrzebowice	P13	2			6	6			0.673
2016	Potrzebowice	P14	2			5	5			0.707
2016	Potrzebowice	P14	2			5	6			0.711
2016	Potrzebowice	P19	?			5	5	1		0.683
2016	Potrzebowice	P21	2			5	5			0.713
2016	Potrzebowice	P22	1			5	5	1		0.621
2016	Potrzebowice	P22	1			5	5			0.642
2016	Potrzebowice	P23	?			5	5			0.653
2016	Potrzebowice	P26	2			5	5			0.718
2016	Potrzebowice	P29	1			5	6			0.61
2016	Potrzebowice	P29	1			6	5			0.638
2016	Potrzebowice	P29	1			5	5			0.646
2016	Potrzebowice	P29	1			6	5			0.666
2016	Potrzebowice	P29	1			6	5	1		0.615
2016	Potrzebowice	P29	2			6	5			0.678
2016	Potrzebowice	P29	2			5	5			0.676
2016	Potrzebowice	P29	2		2	6	5			0.699
2016	Potrzebowice	P29	?			5	5	2		0.636
2016	Potrzebowice	P29	?	missing	missing	missing	5			0.691
2016	Potrzebowice	P30	1			5	6			0.64
2016	Potrzebowice	P30	2			5	5			0.661
2016	Potrzebowice	P31	2		1	5	5			0.664
2016	Potrzebowice	P32	1			5	5			0.697
2016	Potrzebowice	P32	1			5	5			0.664
2016	Potrzebowice	P32	2			5	5			0.655
2016	Potrzebowice	P33	1			5	5	1		0.667
2016	Potrzebowice	P33	1			5	5			0.667
2016	Potrzebowice	P33	2			5	5			0.711
2016	Potrzebowice	P33	2			7	6			0.687
2016	Potrzebowice	P39	2			5	5			0.693
2016	Potrzebowice	P39	2			6	6			0.72
2016	Kaczory	K1-1	2			6	5			0.638
2016	Kaczory	K1-1	2			5	5			0.683
2016	Kaczory	K1-3	2			6	6			0.702
2016	Kaczory	K2-3	2			5	5			0.714
2016	Kaczory	K2-3	2			5	5			0.687
2016	Zdrojowa Góra	Z1-1	1			6	6			0.613
2016	Zdrojowa Góra	Z1-1	1			5	5			0.664
2016	Zdrojowa Góra	Z1-1	1			5	6			0.638
2016	Zdrojowa Góra	Z1-1	1			5	5			0.624
2016	Zdrojowa Góra	Z1-1	2			5	5			0.62
2016	Zdrojowa Góra	Z1-2	1		1	7	6	1		0.642
2016	Zdrojowa Góra	Z1-2	1			5	5			0.688
2016	Zdrojowa Góra	Z1-2	2			7	8			0.66
2016	Zdrojowa Góra	Z1-3	1		2	5	5			0.648
2016	Zdrojowa Góra	Z2-2	1			4	5			0.656
2016	Zdrojowa Góra	Z2-2	1			5	5			0.667
2016	Zdrojowa Góra	Z2-3	2			5	6			0.63
2016	Zdrojowa Góra	Z2-3	2			5	5			0.677
2016	Zdrojowa Góra	Z2-3	?			5	missing	missing	missing	missing
2016	Trzcianka	T2-1	1			5	5			0.687
2016	Trzcianka	T2-1	1			5	6			0.661
2016	Trzcianka	T2-1	2			5	6			0.732
2016	Trzcianka	T2-1	2			5	5			0.686
2016	Trzcianka	T2-1	2			5	5			0.647
2016	Trzcianka	T2-1	2		2	6	5			0.648
2016	Trzcianka	T2-2	2		2	5	5	2		0.636
2016	Trzcianka	T2-3	2			6	7			0.647
2016	Trzcianka	T2-3	2			5	5			0.723
2016	Trzcianka	T2-3	?	missing	missing	missing	5			0.652

## Sheet: Raw_data_age
Study site	Age of the study sites
	2014	2015	2016
M1	17	18	19
M2	50	51	52
M3	57	58	59
M4	40	41	42
M5	57	58	59
M6	49	50	51
M7	37	38	39
M8	34	35	36
M9	44	45	46
M10	41	42	43
M11	48	49	50
M12	37	38	39
M13	6	7	8
M14	30	31	32
M15	35	36	37
M16	47	48	49
M17	56	57	58
M18	40	41	42
M19	37	38	39
M20	14	15	16
M21	37	38	39
M22	37	38	39
M23	117	118	119
M24	28	29	30
M25	57	58	59
M26	16	17	18
M27	57	58	59
M28	61	62	63
M29	57	58	59
M30	102	103	104
M31	117	118	119
M32	117	118	119
M33	117	118	119
M34	62	63	64
M35	97	98	99
M36	97	98	99
M37	57	58	59
M38	17	18	19
M39	57	58	59
M40	77	78	79
M41	29	30	31
M42	57	58	59
M43	57	58	59
M44	12	13	14
M45	21	22	23
M46	57	58	59
M47	40	41	42
M48	67	68	69
M49	21	22	23
M50	44	45	46
M51	36	37	38
M52	51	52	53
M53	61	62	63
M54	60	61	62
M55	97	98	99
M56	61	62	63
M57	97	98	99
M58	26	27	28
M59	61	62	63
M60	61	62	63
M61	97	98	99
M63	25	26	27
M64	35	36	37
M65	39	40	41
M66	25	26	27
M67	97	98	99
M68	31	32	33
M69	31	32	33
M70	57	58	59
M71	57	58	59
M72	44	45	46
M73	35	36	37
M74	17	18	19
M75	41	42	43
M76	44	45	46
M77	44	45	46
M78	44	45	46
M79	41	42	43
M80	12	13	14
M81	24	25	26
M82	30	31	32
M83	47	48	49
M84	30	31	32
M85	57	58	59
M86	22	23	24
M87	57	58	59
M88	35	36	37
M89	40	41	42
M90	14	15	16
M91	57	58	59
M92	97	98	99
